# Supplementary material for: Characterization of Unique Small RNA Populations from Rice Grain
Source: PLoS One. 2008 Aug 6;3(8):e2871. doi: 10.1371/journal.pone.0002871 (PMC2518513; doi:10.1371/journal.pone.0002871)
Supplement: Table S2 — Small RNA hotspots from rice. (0.10 MB XLS) [file pone.0002871.s005.xls]

## Sheet: Sheet1
Table S2. Small RNA hotspots from rice, P<E-50
					Hotspot P-value			Phase uniquenessa
Chr	Strand	Library	Start	End	Grain	Seedling	Class		Locus annotation
1	W/C	grain	135001	139000	8.01E-92/6.75E-83		Disperse	0.1506	Os01g01290, HAP5
1	W	grain	412001	413000	1.58e-74		Repeat		tRNAglu
1	C	grain	670001	671000	5.05e-175		Repeat		tRNAser
1	W	G/S	1211001	1212000	1.24e-187	0	miRNA		miR159b
1	W	grain	3418001	3419000	6.17e-135		Repeat		tRNAser
1	C	grain	3513001	3514000	4.01e-180		Repeat		tRNAcys
1	W	grain	4394001	4395000	2.4e-123		19flag		tRNA
1	W	grain	4399001	4400000	8.52e-154		Repeat		tRNAgly
1	W	G/S	4662001	4664000	1.19e-125	0	miRNA		miR156b
1	C	grain	4774001	4775000	5.12e-65		Disperse	0.1463	Os01g09384, ankyrin repeat
1	W/C	grain	5577001	5578000	2.07E-72/9.05E-90		Disperse		Os01g10520, unknown
1	W	grain	5766001	5767000	1.58e-74		Repeat		tRNAglu
1	C	grain	6674001	6675000	1.52e-195		miRNA		miR319b
1	W/C	grain	7158001	7161000	1.19E-100/7.84E-63		Disperse	0.2121	Os01g12890, EMF1-like
1	W	grain	7431001	7432000	1.58e-74		Repeat		tRNAglu
1	C	grain	8599001	8600000	7.17e-74		Disperse
1	W	G/S	8725001	8726000	0	0	miRNA		miR169a
1	W	grain	10544001	10545000	1.76e-232		Repeat		transposon
1	C	Seedling	11649001	11650000		0	Disperse	0.1619
1	W	G/S	12284001	12285000	0	0	miRNA		miR408
1	W	grain	13318001	13319000	5.2e-289		Repeat		tRNAasn
1	W/C	grain	13769001	13772000	0/0		Disperse	0.691	Os01g24460, HAP5
1	W	G/S	14112001	14113000	0	0	miRNA		miR820a
1	C	G/S	16562001	16563000	4.49E-316	3.88e-125	Repeat		transposon
1	C	grain	16584001	16585000	3.87e-248		Repeat		transposon
1	W	G/S	18008001	18010000	1.24e-187	0	miRNA		miR159a
1	W	G/S	18334001	18335000	0	3.22e-115	18flag
1	C	Seedling	19324001	19325000		1.16e-89	Repeat		tRNApro, tRNAtrp
1	W	grain	20170001	20171000	2.07e-72		Repeat		transposon
1	W/C	grain	22801001	22803000	7.07E-58/0		Disperse	0.1539	Os01g39850, HAP5
1	C	grain	22805001	22806000	4.64e-305		Sparse
1	C	G/S	22851001	22852000	4.95e-135	0	miRNA		miR156a
1	W	grain	24700001	24701000	2.22e-217		Repeat		tRNAgly
1	W/C	G/S	25653001	25654000	3.34E-68/8.28E-308	4.47e-85	Disperse		inverted repeat
1	C	Seedling	25656001	25657000		2.37e-288	Repeat		tRNAarg
1	C	grain	27150001	27151000	2.55e-203		miRNA		miR319a
1	W	grain	27255001	27256000	7.87e-54		Disperse
1	W	G/S	27566001	27567000	5.04e-94	5.1e-113	Repeat		tRNAarg
1	W	grain	28457001	28458000	3.34e-68		Repeat		tRNAglu
1	C	grain	29503001	29504000	3.87e-248		Repeat		transposon
1	W	G/S	31850001	31851000	5.04e-94	5.1e-113	Repeat		tRNAarg
1	C	grain	32309001	32310000	1.22e-71		Repeat		tRNAtyr
1	C	Seedling	33013001	33014000		0	miRNA		miR167j
1	C	Seedling	33832001	33833000		2.48e-137	Repeat		tRNAglu, tRNAarg, tRNAasp
1	W	grain	33844001	33845000	4.88e-64		Repeat		tRNAphe
1	W	grain	33847001	33848000	2.87e-85		Sparse
1	W	Seedling	33859001	33860000		7.63e-140	Repeat		45S rRNA
1	W/C	G/S	33888001	33889000	1.22e-71	2.83E-151/3.78E-54	Repeat		tRNAphe
1	W	Seedling	33891001	33892000		4.05e-142	Repeat
1	C	Seedling	33908001	33909000		3.58e-157	Repeat
1	C	grain	33913001	33914000	3.53e-85		Repeat		45S rRNA
1	W/C	Seedling	33915001	33917000		2.6E-135/6.19E-65	Repeat		tRNAarg, tRNAasn
1	W	G/S	35269001	35270000	0	5.62e-149	Repeat		tRNAile
1	C	grain	36128001	36129000	1.26e-80		Repeat		tRNAglu
1	W	grain	37766001	37767000	6.37e-112		Sparse
1	W/C	grain	38671001	38672000	4.88E-64/1.91E-120		Disperse		Os01g66070
1	W	G/S	39574001	39575000	0	2.12e-144	Repeat		tRNAile
1	C	grain	40412001	40413000	3.21e-54		Repeat		tRNAala
1	W	Seedling	40770001	40771000		2.74e-104	Target		Os01g69940, F-box; miR394 target
1	C	grain	40868001	40869000	1.17e-60		Disperse		Os01g70060
1	C	Seedling	41634001	41635000		1.39e-60	Repeat
1	C	grain	42961001	42962000	2.1e-101		Repeat		tRNAcys
1	W	G/S	43470001	43471000	6.42e-60	5.83e-252	Repeat		tRNAarg
2	W	Seedling	816001	817000		9.19e-83	Repeat		tRNAcys, tRNAasn
2	C	G/S	1553001	1554000	0	0	miRNA		miR168a
2	C	G/S	3280001	3281000	0	0	miRNA		miR397b
2	C	G/S	3511001	3512000	0	0	miRNA		miR160a
2	C	Seedling	3742001	3743000		0	miRNA		miR167e
2	C	grain	4371001	4372000	1.34e-68		Repeat		tRNAglu
2	C	G/S	4512001	4513000	1.58e-113	0	miRNA		miR156d
2	C	grain	5215001	5216000	1.8e-82		Repeat		tRNAglu
2	C	grain	6155001	6156000	3.12e-198		Repeat		tRNAgly
2	C	grain	8534001	8535000	1.62e-72		Repeat		tRNAgln
2	W	Seedling	8804001	8805000		1.1e-80	Sparse		Os02g15640, inverted repeat
2	W/C	Seedling	9902001	9903000		1.06E-99/0	Disperse		inverted repeat
2	C	grain	11135001	11136000	3.18e-212		Repeat		transposon
2	C	grain	11898001	11899000	3.29e-55		Repeat	0.1463	transposon
2	C	grain	12389001	12390000	1.08e-94		Disperse		Os02g20950
2	C	Seedling	14236001	14237000		9.69e-87	Repeat
2	W	Seedling	14241001	14242000		1.86e-72	Repeat		45S rRNA
2	C	Seedling	14274001	14275000		3.55e-70	Repeat		tRNAglu, tRNAtyr, tRNAasp
2	C	grain	15657001	15658000	3.12e-198		Repeat		tRNAgly
2	W	Seedling	16221001	16222000		6.46e-249	miRNA		miR529
2	W	grain	16230001	16231000	1.88e-215		Repeat		Ty3/gypsy
2	W	grain	17350001	17351000	2.74e-59		Disperse		Os02g29230, DEMETER-like protein, ROS-like
2	C	Seedling	18552001	18553000		0	miRNA		miR169f
2	W	grain	21496001	21497000	1.41e-105		Sparse
2	W	grain	21512001	21513000	8.83e-190		Repeat		tRNAser
2	C	G/S	22294001	22295000	0	0	Target		AGL21-like; miR444 target
2	W	G/S	23600001	23601000	0	0	miRNA		miR162a
2	C	G/S	23895001	23896000	1.83e-80	4.07e-189	Sparse		miRMON18; ID#370903
2	W/C	G/S	24016001	24017000	2.09e-111	9.19E-83/0	Phased	0.8761	ID#1192624
2	C	G/S	24114001	24115000	1.98e-159	0	miRNA		miR156i
2	C	grain	24711001	24712000	3.12e-198		Repeat		tRNAgly
2	C	G/S	25129001	25130000	0	0	Target		Os2g41800, ARF16
2	W	G/S	26124001	26125000	0	0	miRNA		miR166d
2	C	grain	26671001	26672000	6.95e-61		Repeat		tRNAglu
2	W	Seedling	27142001	27143000		5.16e-104	miRNA		miR394
2	C	Seedling	27722001	27723000		0	19flag		45S rRNA
2	W	G/S	28709001	28712000	0	0	Repeat	0.1602	45S rRNA
2	W	G/S	28713001	28717000	0	1.69e-74	Repeat	0.2548	45S rRNA
2	W	Seedling	28859001	28860000		0	Target		Os02g47280, GRF1-like; miR396 target
2	C	G/S	30455001	30456000	0	0	miRNA		Os02g49840, miR444
2	C	G/S	30457001	30458000	1.34e-193	4.78e-147	miRNA		miR444*; ID#1347658
2	C	Seedling	31200001	31201000		0	miRNA		miR169e
2	W	grain	31847001	31848000	2.74e-59		Repeat		tRNAtyr
2	C	G/S	32429001	32430000	1.58e-113	0	miRNA		miR166h
2	W	Seedling	32835001	32836000		0	Target		Os02g53690, GRF1-like; miR396 target
2	C	Seedling	33137001	33138000		0	miRNA		miR164d
2	C	grain	33617001	33618000	1.18e-66		Repeat		tRNAglu
2	C	grain	34005001	34006000	3.29e-55		Repeat	0.1383
2	W	grain	34274001	34275000	1.68e-55		miRNA		miR396a
2	C	Seedling	34282001	34283000		4.87e-112	miRNA		miR396c
2	C	Seedling	35137001	35138000		1.19e-71	miRNA		miR172d
2	C	Seedling	35630001	35631000		0	miRNA		miR396, new member
2	W	grain	35750001	35751000	2.74e-59		18flag
3	C	grain	1422001	1423000	1.28e-56		Repeat		tRNAhis
3	C	grain	1545001	1546000	1.28e-122		Repeat		tRNAasn
3	W	G/S	1645001	1646000	4.39e-107	3.22e-271	miRNA		miR528
3	C	grain	1891001	1892000	2.72e-63		Repeat	0.1521
3	W	Seedling	1949001	1950000		0	miRNA		miR171e
3	W	grain	2118001	2119000	4.81e-234		Repeat		tRNAgly
3	C	Seedling	2428001	2429000		6.09e-71	18flag
3	C	grain	2586001	2587000	2.87e-240		Repeat		tRNAgly
3	C	grain	2955001	2956000	8.34e-68		18flag		Ty3/gypsy
3	W	Seedling	3326001	3327000		0	miRNA		miR167g
3	W	G/S	3466001	3467000	0	0	miRNA		miR166c
3	W	grain	4680001	4681000	1.39e-74		Repeat		tRNAtyr
3	C	Seedling	6761001	6762000		8.38e-273	Repeat		tRNAarg
3	W	Seedling	7935001	7936000		2.4e-95	Repeat		45S rRNA
3	C	G/S	8375001	8376000	0	2.1e-275	miRNA		miR408, new member
3	W	G/S	9582001	9583000	1.17e-65	4.63e-256	Repeat		tRNAarg
3	W	grain	10189001	10190000	8.1e-55		Repeat		tRNAhis
3	W	grain	10370001	10371000	4.65e-242		Repeat		tRNAgly
3	W	G/S	10521001	10522000	0	6.84e-89	miRNA		miR164e
3	C	grain	10731001	10732000	4.69e-61		Repeat		tRNAala
3	C	Seedling	11255001	11256000		4.57e-73	Phased	1	TAS3
3	C	grain	11528001	11529000	5.85e-84		Repeat		tRNAglu
3	W	Seedling	13624001	13625000		7.15e-56	Repeat		tRNAhis
3	W/C	Seedling	14012001	14014000		7.42E-58/1.09E-133	Repeat		tRNAasn, tRNAarg, 45S rRNA
3	W	Seedling	15618001	15619000		2.49e-182	Disperse		Os03g27290, CytC oxidase subunit VIb
3	W	grain	16834001	16835000	1.39e-74		Repeat		tRNAlys
3	W	Seedling	21146001	21147000		0	miRNA		miR171i
3	W	grain	21288001	21289000	1.39e-74		Repeat		Ty3/gypsy
3	W	grain	23506001	23507000	4.24e-70		Repeat		tRNAtyr
3	W	grain	23613001	23614000	7.27e-112		Repeat		45S rRNA
3	C	Seedling	23787001	23788000		5.16e-129	Repeat		SINE
3	C	Seedling	25201001	25202000		2.23e-56	Repeat		tRNAleu
3	W	grain	25573001	25574000	0		Repeat		tRNAgly
3	W	Seedling	26404001	26405000		2.46e-163	Repeat		tRNAarg
3	C	Seedling	26406001	26407000		1.83e-288	Repeat		tRNAarg
3	C	Seedling	26630001	26631000		0	19flag		Os03g47140, GRF1-like; miR396 target
3	W	grain	29333001	29334000	1.31e-90		Disperse		disperse
3	C	G/S	29376001	29377000	5.85e-84	2.1e-275	Repeat		tRNAarg
3	W	Seedling	29978001	29979000		0	miRNA		miR171f
3	C	G/S	30343001	30344000	0	0	miRNA		miR166n
3	C	G/S	30497001	30498000	2.3e-72	0	miRNA		miR167b
3	W	G/S	31145001	31146000	2.47e-102	3.95e-115	Repeat		tRNAarg
3	W/C	Seedling	31750001	31756000		2.30E-117/1.24E-64	Repeat		45S rRNA
3	W	G/S	32393001	32394000	0	0	miRNA		miR160d
3	W	grain	32728001	32729000	1.26e-181		Repeat		tRNAcys
3	W	grain	32908001	32909000	4.81e-234		Repeat		tRNAgly
3	W	G/S	33069001	33070000	4.24e-70	0	miRNA		miR167c
3	W	grain	33855001	33856000	1.32e-207		Repeat		tRNAmet
3	C	G/S	34214001	34215000	0	0	miRNA		miR390
3	W	Seedling	35721001	35722000		1.14e-144	miRNA		miR169, new member
4	W	grain	784001	785000	6.82e-74		Sparse		Os04g02280 F-box
4	W/C	grain	4579001	4580000	5.21E-102/1.69E-61		Disperse		Os04g08500
4	C	grain	6505001	6506000	1.33e-72		Sparse		sparse, Os04g11900
4	C	grain	8231001	8232000	2.12e-79		Repeat		Ty3/gypsy
4	C	Seedling	9070001	9071000		3.68e-128	Repeat
4	W	Seedling	9075001	9076000		1.02e-75	Repeat		45S rRNA
4	W	Seedling	9077001	9078000		2.07e-109	Repeat		45S rRNA
4	W	Seedling	9079001	9080000		6.55e-54	Repeat		45S rRNA
4	W/C	Seedling	9081001	9082000		3.51E-129/7.19E-52	Repeat		45S rRNA, tRNAarg, tRNAasn
4	W	Seedling	9085001	9086000		0	Repeat		S15 ribosomal protein
4	C	Seedling	9098001	9099000		3.68e-128	Repeat
4	W	Seedling	9117001	9118000		1.09e-61	Repeat		tRNAhis
4	W	Seedling	9127001	9128000		3.95e-138	Repeat
4	C	Seedling	9133001	9134000		1.17e-53	Repeat		tRNAhis
4	C	Seedling	9146001	9147000		4.52e-126	Repeat
4	W	Seedling	9151001	9152000		1.2e-65	Repeat		45S rRNA
4	W	Seedling	9163001	9164000		1.02e-75	Repeat		tRNAglu, tRNAtyr, tRNAasp
4	C	Seedling	9178001	9179000		4.52e-126	Repeat
4	W	Seedling	9183001	9184000		9.98e-60	Repeat		45S rRNA
4	W	Seedling	9186001	9187000		3.51e-129	Repeat		45S rRNA
4	W	Seedling	9189001	9190000		3.59e-147	Repeat		45S rRNA, tRNAarg
4	W	Seedling	12521001	12522000		8.91e-58	Sparse		Os4g22130
4	C	grain	12869001	12870000	7.37e-75		Repeat
4	W/C	grain	13678001	13679000	0/0		18flag
4	W	grain	15489001	15490000	1.88e-121		Repeat
4	W	G/S	17518001	17519000	1.18E-312	4.14e-88	Repeat		45S rRNA
4	C	Seedling	18912001	18913000		4.52e-126	Repeat
4	W	Seedling	19232001	19233000		0	miRNA		miR169g
4	W	G/S	19527001	19529000	6.47e-241	0	Repeat		MITE transposon
4	W	Seedling	21005001	21006000		1.2e-65	Sparse
4	W	grain	21674001	21676000	7.88e-54		Repeat	0.1678	transposon
4	C	G/S	22827001	22828000	0	0	miRNA		Os04g38780, miR444
4	C	G/S	22834001	22835000	3.84e-57	4.67e-218	miRNA		miR444*; ID#179314
4	C	Seedling	23427001	23428000		0	Repeat
4	W	Seedling	23435001	23436000		7.75e-56	Repeat		tRNAhis
4	W	Seedling	24186001	24187000		2.45e-222	miRNA		miR162b
4	W	Seedling	24686001	24687000		9.98e-60	Sparse		Os04g42050
4	C	G/S	24807001	24808000	1.16e-136	0	miRNA		miR156e
4	C	grain	25354001	25355000	9.29e-235		Repeat		tRNAgly
4	C	G/S	25795001	25796000	0	0	Target		Os04g43910, ARF16-like; miR160 target
4	C	grain	25941001	25942000	2.12e-79		Disperse		Os04g44190
4	W	grain	26093001	26094000	0		Repeat		tRNAphe
4	C	grain	26551001	26553000	3.84e-57		Disperse		Os04g45290 B-fructofuranosidase
4	W	grain	27227001	27228000	3.97e-90		Repeat		Os04g346310, HEAT repeat
4	W	grain	27637001	27638000	5.47e-172		Repeat		tRNAcys
4	W	Seedling	28263001	28264000		2.21e-140	miRNA		miR171h
4	W	Seedling	30101001	30102000		0	19flag		Os04g51190, GRF1-like; miR396 target
4	C	Seedling	30493001	30494000		0	miRNA		miR169c
4	W	grain	30990001	30992000	7.88e-54		Repeat	0.1463	Os04g52479
4	C	Seedling	31179001	31180000		6.04e-143	Repeat		tRNAarg
4	C	grain	31190001	31191000	2.33e-70		Repeat		tRNAtyr
4	C	grain	31370001	31371000	1.09e-81		Repeat		transposon
4	C	G/S	31494001	31495000	3.6e-248	0	miRNA		miR171c
4	C	grain	32679001	32681000	4e-77		Repeat		45S rRNA
4	W	Seedling	34217001	34218000		0	miRNA		miR396d
4	C	Seedling	34712001	34713000		0	miRNA		miR393b
4	C	grain	34867001	34868000	1.33e-72		Repeat		tRNAtyr
4	W	Seedling	35111001	35112000		0	18flag		Os04g59430, ARF10-like; miR160 target
5	W	G/S	899001	900000	4.57e-72	3.23e-241	Repeat		tRNAarg
5	C	grain	913001	914000	1.93e-82		Repeat		tRNAglu
5	W	grain	1590001	1591000	3.16e-254		Repeat		transposon
5	W	G/S	3630001	3631000	4.57e-72	1.89e-255	Repeat		tRNAarg
5	C	grain	3639001	3640000	2.62e-64		Disperse		Os05g06980, myosin heavy chain like
5	W	G/S	3854001	3856000	9.31e-77	0	Sparse		MIRMON22; ID#1319082
5	C	G/S	3871001	3872000	1.78e-299	1.39e-57	Repeat		45S rRNA
5	C	grain	4861001	4862000	9.95e-197		Repeat		tRNAgly
5	C	G/S	7422001	7424000	3.24e-51	8.3e-54	Repeat		opie-2 transposon
5	C	grain	7450001	7451000	1.56e-66		18flag		Ty3/gypsy
5	W	grain	8321001	8322000	8.58e-126		Repeat		Ty3/gypsy
5	W	G/S	8841001	8842000	1.61e-226	0	Sparse		miRMON13; ID#1076577
5	W	grain	11952001	11953000	8.58e-54		18flag
5	C	Seedling	12881001	12882000		1.63e-97	Repeat		45s rRNA
5	C	Seedling	12884001	12885000		1.09e-55	Repeat		45s rRNA
5	W	Seedling	12904001	12905000		2.31e-130	Repeat
5	C	G/S	14119001	14120000	1.82e-96	6.15e-52	Repeat		tRNAtyr
5	W	grain	15062001	15063000	4.07e-65		Disperse		Os05g26040, Pumilio-like
5	C	grain	15456001	15457000	1.13e-244		Repeat		transposon
5	C	G/S	15818001	15819000	1.56e-66	0	miRNA		miR164b
5	C	grain	17616001	17617000	1.93e-82		Repeat		tRNAglu
5	C	G/S	17719001	17720000	0	0	19flag
5	C	grain	18147001	18148000	1.59e-55		Disperse
5	W	grain	18149001	18150000	1.51e-60		Disperse		Os05g31370
5	W	grain	18167001	18168000	4.97e-56		Disperse		Os05g31390
5	C	grain	18394001	18395000	0		18flag
5	W	Seedling	18417001	18418000		1.4e-243	Repeat		tRNAarg
5	C	grain	19391001	19392000	1.93e-82		Repeat		tRNAglu
5	C	G/S	20669001	20670000	1.33e-103	6.77e-106	Repeat		tRNAarg
5	W	G/S	22444001	22445000	7.86e-213	1.96e-192	18flag		Os05g38410, Laccase; miR397 target
5	C	G/S	22451001	22452000	1.28e-204	2.91e-197	18flag		Os05g38420, Laccase; miR397 target
5	C	grain	22773001	22774000	1.93e-82		Repeat		tRNAglu
5	W	G/S	23260001	23261000	9.74e-70	0	miRNA		miR164f
5	W	grain	24123001	24124000	1.81e-180		Repeat		tRNAgly
5	C	G/S	25503001	25504000	1.33e-103	5.22e-108	Repeat		tRNAarg
5	W	grain	25552001	25553000	1.43e-51		Repeat		tRNAala
5	W	grain	27782001	27783000	1.28e-262		Repeat		tRNAser
5	C	Seedling	28045001	28046000		2.29E-93/	Repeat		tRNAarg
5	W	Seedling	28845001	28846000		3.23e-241
5	C	grain	29460001	29461000	1.39e-236		Repeat		tRNAgly
6	W	Seedling	894001	895000		0	19flag		Os06g02560, GRF1-like; miR396 target
6	C	grain	1068001	1069000	1.6e-119		19flag		transposon
6	W	Seedling	1561001	1562000		5.91e-75	miRNA		miR399d
6	W	grain	2364001	2365000	2.27e-240		Repeat		tRNAgly
6	W	grain	3668001	3669000	2.11e-72		miRNA		miR396b
6	C	Seedling	5299001	5300000		0	19flag		Os06g10310, GRF1-like; miR396 target
6	W	grain	5826001	5827000	1.44e-248		Repeat		transposon
6	W/C	G/S	8365001	8367000	1.48E-312/9.93E-86	1.61e-112	Repeat		45S rRNA
6	C	G/S	11023001	11024000	0	7.08e-188	18flag		Os06g19370, embryogenesis transmembrane
6	C	grain	12654001	12655000	0		Phased	0.9963	Os06g21900, phased siRNA
6	C	grain	12656001	12657000	0		Phased	0.9717	Os06g21900, phased siRNA
6	W	grain	15348001	15349000	1.06e-74		Sparse		Os06g26234 alpha-amylase
6	C	Seedling	17007001	17008000		3.8e-72	Sparse		Os06g29650; MIRMON23; ID#932433
6	W	G/S	17504001	17505000	2.89e-52	2.48e-140	Repeat		transposon
6	W	G/S	20629001	20630000	3.28e-232	2.82e-60	Repeat		Ty3/gypsy
6	W	G/S	21163001	21165000	1.44e-248	1.61e-112	Repeat		MITE
6	C	Seedling	21245001	21246000		0	Repeat
6	C	grain	23183001	23184000	9.36e-91		Repeat		tRNAgly
6	W	Seedling	23577001	23578000		1.02e-105	Repeat		tRNApro, tRNAtrp
6	W	G/S	26553001	26554000	5.97e-153	0	miRNA		miR156h
6	W	grain	26709001	26710000	7.53e-96		Repeat		tRNAglu
6	C	Seedling	27295001	27296000		0	miRNA		miR169b
6	W	Seedling	27673001	27674000		0	miRNA		miR167i
6	W	G/S	28080001	28081000	0	0	miRNA		miR160b
6	W	Seedling	28179001	28180000		3.18e-58	Repeat		tRNAleu
6	W	G/S	28488001	28489000	4.71e-254	2.8e-277	miRNA		miR397a
6	C	G/S	28587001	28588000	0	0	Target		Os06g47150, ARF16-like; miR160 target
6	W	grain	29672001	29673000	1.2e-56		Repeat		tRNAhis
6	C	G/S	30326001	30327000	0	0	miRNA		miR166b
7	W/C	G/S	134001	138000	5.73E-80/0	9.67E-86/0	Disperse	0.2068	Os07g01240, unknown
7	C	grain	696001	697000	1.01e-194		Phased	0.8873	ID#895588
7	C	G/S	2215001	2216000	0	0	miRNA		miR160e
7	W	grain	3658001	3659000	3.62e-236		Repeat		tRNAgly
7	W	G/S	3664001	3665000	0	0	Repeat		tRNAgly
7	C	Seedling	4164001	4165000		0	miRNA		miR167d
7	W/C	grain	4703001	4708000	1.42E-57/2.85E-71		Target		Os07g09020, AGO1; miR168 target
7	C	grain	4993001	4994000	5.94e-67		Disperse		Os07g09460
7	C	grain	6257001	6258000	1.88e-58		Disperse		Os07g11380 alpha amylase inhibitor
7	C	grain	8201001	8202000	5.89e-89		Repeat		tRNAglu
7	C	grain	9357001	9358000	4.17e-69		Sparse
7	W	grain	9670001	9671000	3.04e-244		Repeat		transposon
7	W	Seedling	12754001	12755000		8.41e-185	Sparse		Os07g22640, CLB1-like
7	C	G/S	13058001	13061000	1.12e-62	2.42e-67	Disperse		Os07g23169, methyltransferase-like
7	C	G/S	13118001	13120000	0	0	miRNA		miR820b
7	C	Seedling	14230001	14231000		4.64e-51	Repeat		45S rRNA
7	W	Seedling	14235001	14236000		6.51e-169	Repeat
7	C	Seedling	14242001	14243000		1.32e-54	Repeat		tRNAhis
7	C	Seedling	15920001	15921000		8e-62	18flag		Os07g27360, hypothetical
7	W	grain	19467001	19468000	0		18flag
7	C	grain	21302001	21304000	2.98e-82		Disperse		Os07g35600
7	C	grain	21685001	21686000	2.82e-54		Disperse
7	C	grain	21688001	21689000	7.89e-78		Disperse
7	W/C	grain	21714001	21717000	4.23E-51/1.90E-73		Disperse
7	W	grain	22030001	22031000	5.73e-80		Repeat		Ty3/gypsy
7	C	grain	24598001	24599000	1.55e-109		Repeat		tRNAasn
7	C	grain	25222001	25223000	4.17e-69		Repeat		tRNAser
7	C	Seedling	27034001	27035000		6.02e-73	18flag
7	W	grain	28475001	28476000	7.38e-118		19flag
7	C	G/S	28521001	28522000	1.12e-62	0	miRNA		miR164a
7	W	grain	28699001	28700000	1.51e-142		Repeat		tRNAser
7	C	grain	29473001	29474000	3.07e-220		Repeat		tRNAgly
7	C	grain	29491001	29492000	3.29e-52		Repeat		tRNAhis
8	W/C	grain	1623001	1625000	5.78E-76/3.29E-75		Disperse	0.175	Os08g03470, POZ domain
8	W	G/S	1701001	1702000	0	0	miRNA		miR160c
8	C	G/S	2030001	2031000	3.78e-131	2.22e-305	Target		Os08g04190, START domain; miR166 target
8	C	grain	3960001	3961000	3.17e-64		Sparse		Os08g07090
8	W	G/S	5362001	5363000	1.31e-233	0	miRNA		miR171b
8	W	grain	5855001	5856000	2.63e-65		Repeat		tRNAtyr
8	W	G/S	5861001	5862000	9.51e-211	2.27e-145	Repeat		tRNAarg
8	W	grain	6519001	6520000	6.82e-53		Repeat	0.0448	Ty3/gypsy
8	W	Seedling	7634001	7635000		0	miRNA		miR169p
8	C	grain	8696001	8697000	0		Sparse		MIRMON24; ID#1027627
8	W	grain	9050001	9051000	5.57e-57		Repeat	0.1323	Ty1/copia
8	W	G/S	9186001	9188000	3.97e-78	3.57e-54	Disperse		Os08g15204, thioredoxin-like
8	C	Seedling	9238001	9239000		1.49e-149	Repeat		tRNAasn, tRNAarg
8	C	Seedling	9240001	9241000		3.69e-65	Repeat		45S rRNA
8	C	Seedling	9242001	9243000		2.06e-129	Repeat		45S rRNA
8	C	Seedling	9244001	9245000		2.07e-67	Repeat		45S rRNA
8	W	Seedling	9249001	9250000		1.28e-66	Repeat
8	C	Seedling	9255001	9256000		5.99e-72	Repeat		tRNAhis
8	C	G/S	9922001	9923000	0	0	18flag		transposon
8	W	grain	15409001	15410000	1.68e-228		Repeat		transposon
8	C	grain	17063001	17064000	8.79e-71		Repeat		tRNAtyr
8	W	grain	17377001	17378000	0		19flag
8	C	grain	19104001	19105000	6.95e-230		Repeat		tRNAgly
8	C	G/S	19260001	19261000	1.09e-155	5.16e-250	Repeat
8	W	grain	19327001	19328000	2.04e-67		Repeat		tRNAtyr
8	W	grain	19342001	19343000	3.1e-116		Repeat		tRNAtyr
8	W	grain	19513001	19514000	1.76e-82		Repeat		tRNAlys
8	W/C	G/S	20106001	20109000	4.81E-59/6.52E-124	6.4e-52	Disperse
8	C	grain	20110001	20112000	0		Disperse		Os08g32680
8	C	Seedling	20117001	20118000		1.56e-76	Sparse		Os08g32690, unknown
8	C	G/S	20751001	20752000	4.61e-62	2.06e-129	Sparse		Os08g33479, unknown
8	W	G/S	20753001	20754000	0	0	Sparse		Os08g33479, unknown
8	W	G/S	20766001	20767000	0	0	miRNA		Os08g33488, miR444
8	W	G/S	21345001	21346000	7.33e-128	0	miRNA		miR156f
8	W	G/S	21358001	21359000	7.33e-128	0	miRNA		miR156f
8	W	Seedling	22192001	22193000		2.56e-60	Repeat		Os08g35420, photosystem Q
8	C	grain	22373001	22374000	8.79e-71		Disperse		disperse
8	C	G/S	22661001	22662000	0	2.08e-134	Repeat		tRNAser
8	W/C	grain	22689001	22696000	5.57E-57/6.51E-60		Repeat	0.1566	transposon
8	W	G/S	22912001	22913000	0	0	miRNA		miR166m
8	W	Seedling	24264001	24265000		0	miRNA		miR160f
8	W	grain	25819001	25820000	5.78e-76		Repeat		tRNAglu
8	W	Seedling	26670001	26671000		0	miRNA		miR169i
8	W	Seedling	26674001	26675000		0	miRNA		miR169h
8	W	Seedling	26681001	26682000		0	miRNA		miR169m
8	W	Seedling	26684001	26685000		0	miRNA		miR169l
8	W	grain	27698001	27699000	5.78e-76		Repeat		tRNAglu
8	C	G/S	27737001	27738000	1.54e-53	9.56e-253	Repeat		tRNAarg
9	W	G/S	1	37000	0	0	Repeat	0.3075	Os09g00998
9	C	G/S	296001	297000	4.06e-102	1.59e-129	Repeat		tRNAarg
9	C	grain	1830001	1831000	2.75e-244		Repeat		transposon
9	C	Seedling	5696001	5698000		5.66e-52	Repeat		Copia transposon
9	C	grain	9571001	9572000	4.06e-102		Repeat		tRNAval
9	W	G/S	10349001	10350000	3.73e-202	4.43e-58	Repeat		tRNAasp
9	W	grain	10892001	10893000	0		Sparse		sparse
9	C	Seedling	11945001	11946000		9.66e-70	Repeat		tRNAhis
9	C	G/S	12144001	12145000	2.21e-199	2.3e-95	Repeat		tRNAtyr
9	C	G/S	13210001	13211000	3.25e-81	1.29e-90	Sparse		MIRMON25; ID#338161
9	W/C	G/S	13603001	13605000	0/5.65E-274	6.40E-128/4.44E-122	Repeat	0.1563	transposon
9	C	Seedling	14506001	14507000		9.66e-70	Repeat		tRNAhis
9	C	grain	14618001	14619000	0		Repeat		tRNAile
9	W	G/S	15064001	15065000	9.85e-63	0	miRNA		miR156g
9	W	Seedling	15791001	15792000		0	Sparse		Os09g26190, PPR domain, inverted repeat
9	C	grain	16534001	16535000	4.06e-102		Disperse
9	C	grain	16538001	16539000	4.54e-95		Disperse
9	W	Seedling	16950001	16951000		5.75e-174	miRNA		miR166l
9	C	grain	19536001	19537000	1.65e-65		Disperse		Os09g32750, forkhead-like
9	W	Seedling	19788001	19789000		0	miRNA		miR169j
9	W	Seedling	19791001	19792000		0	miRNA		miR169k
9	W	grain	21044001	21045000	2.97e-52		Repeat
9	W	grain	21158001	21159000	0		18flag
9	C	Seedling	22416001	22417000		2.92e-183	Repeat		tRNAarg
9	W	Seedling	22881001	22882000		8.58e-57	miRNA		miR172a
10	W	Seedling	332001	333000		3.08e-283	Repeat		tRNAarg
10	C	grain	2303001	2304000	2.82e-70		Repeat		transposon
10	W/C	grain	2394001	2399000	2.00E-72/1.33E-83		Disperse	0.1081
10	C	grain	2409001	2410000	1.31e-61		Disperse	0.4545	Os10g04980, F-box
10	W/C	grain	2713001	2715000	1.55E-55/6.41E-66		Disperse
10	C	grain	3158001	3159000	2.82e-70		Sparse
10	C	Seedling	3947001	3948000		5.28e-59	Disperse		Os10g07470, hypothetical
10	W	G/S	4599001	4600000	3.91e-68	2.46e-173	Repeat		40S ribosomal protein S20
10	W	G/S	6693001	6694000	0	0	miRNA		miR820c
10	C	G/S	9989001	9990000	1.69e-125	6.06e-104	Repeat		CACTA transposon
10	C	Seedling	10459001	10460000		2.39e-51	Repeat		45S rRNA
10	C	Seedling	10461001	10462000		2.24e-110	Repeat		45S rRNA
10	C	Seedling	10463001	10464000		7.7e-67	Repeat		45S rRNA
10	C	Seedling	10475001	10476000		4.08e-87	Repeat		tRNAhis
10	C	Seedling	10480001	10481000		0	Repeat
10	W	Seedling	10491001	10492000		2.4e-126	Repeat		tRNAglu, tRNAtyr
10	W	Seedling	10507001	10508000		1.03e-77	Repeat
10	W/C	G/S	10523001	10524000	3.91e-68	4.65E-51/3.58E-150	Repeat		tRNAphe
10	C	Seedling	10526001	10527000		2.39e-51	Repeat		tRNAmet
10	C	Seedling	10539001	10540000		6.76e-79	Repeat		tRNAhis
10	W	Seedling	10556001	10557000		3.76e-97	Repeat		tRNAhis
10	C	Seedling	10563001	10564000		6.31e-139	Repeat
10	W	Seedling	10568001	10569000		1.71e-73	Repeat		45S rRNA
10	W	Seedling	10570001	10571000		3.09e-108	Repeat		45S rRNA
10	W	Seedling	10572001	10573000		4.87e-53	Repeat		45S rRNA
10	W/C	Seedling	10574001	10575000		1.47E-135/4.51E-57	Repeat		45S rRNA, tRNAarg, tRNAasn
10	C	Seedling	10585001	10586000		3.03e-53	Repeat		tRNAleu
10	W	grain	11117001	11118000	8.8e-62		Sparse
10	C	grain	11656001	11657000	4.31e-68		Repeat		tRNAtyr
10	C	grain	12759001	12760000	0		18flag		Os10g25310, SPX domain
10	W	grain	13419001	13420000	1.55e-55		Disperse
10	C	G/S	14151001	14152000	0	0	miRNA		miR166f
10	C	Seedling	14393001	14394000		0	miRNA		miR167f
10	C	G/S	17726001	17727000	0	0	Target		Os10g33940, ARF16; miR160 target
10	C	G/S	18607001	18608000	1.33e-83	0	18flag		Os10g35436, PPR repeat; miRMON13 target
10	C	G/S	18617001	18618000	1.33e-83	0	18flag		Os10g35436, PPR repeat; miRMON13 target
10	C	grain	18710001	18711000	1.27e-202		Repeat		transposon, snoRNA
10	W	grain	18824001	18825000	4.44e-129		Repeat		7SL RNA
10	W	grain	19391001	19392000	6.15e-79		Repeat		tRNAlys
10	W	G/S	19657001	19658000	0	0	miRNA		miR166a
10	W	Seedling	20124001	20126000		4.87e-53	Repeat		45S rRNA
10	W	Seedling	20127001	20128000		6.1e-131	Repeat		45S rRNA
10	W/C	Seedling	20129001	20132000		4.70E-59/4.51E-57	Repeat		tRNAarg, tRNAasn
10	W/C	G/S	20136001	20137000	1.8e-72	5.25e-159	Repeat		tRNAphe
10	C	Seedling	20152001	20153000		7.7e-75	Repeat		Os10g38292, ATP synthase
10	W	grain	20321001	20322000	4.12e-108		Repeat		tRNAasn
10	C	Seedling	20350001	20351000		7.63e-164	Sparse
10	W	Seedling	20907001	20908000		0	miRNA		miR171d
10	W	grain	21394001	21395000	3.58e-165		Repeat		45S rRNA
10	W	grain	22531001	22532000	8.62e-223		Repeat		tRNAgly
11	W	G/S	255001	256000	3.27e-62	1.75e-84	Repeat		tRNAile
11	C	G/S	958001	959000	1.1e-245	0	miRNA		miR810
11	W/C	G/S	968001	969000	6.61e-96	0/5.37E-66	miRNA		miR810
11	C	G/S	1019001	1020000	1.39e-95	0	Sparse		Os11g02950, PIN1-like auxin efflux carrier
11	C	Seedling	1023001	1024000		9.48e-120	Sparse		Os11g02950, PIN1-like auxin efflux carrier
11	W	grain	1437001	1438000	6.02e-111		Repeat		tRNAval
11	W	G/S	2520001	2522000	4.99e-166	2.65e-63	Repeat		40S ribosomal protein S25
11	W/C	grain	3992001	3995000	6.61E-96/1.39E-88		Disperse		Os11g07840
11	W	grain	5344001	5345000	4.6e-86		Disperse
11	C	G/S	6077001	6078000	0	0	miRNA		miR169o
11	C	G/S	6080001	6081000	0	0	miRNA		miR169n
11	C	Seedling	10835001	10836000		5.78e-64	Repeat	0.2173	tRNAmet
11	W	Seedling	13023001	13024000		4.21e-124	Repeat		transposon
11	C	G/S	15462001	15463000	0	3.84e-180	Repeat		Ty3/gypsy
11	C	G/S	15788001	15789000	2.69e-100	8.71e-129	miRNA		miR535
11	C	Seedling	22136001	22137000		3.89e-279	Repeat		tRNAarg
11	W	grain	23104001	23105000	5.02e-53		Repeat		tRNAala
11	C	grain	23201001	23202000	1.99e-107		Repeat		45S rRNA
11	W	grain	25212001	25214000	5.02e-53		Repeat		Ty3/gypsy
12	W	grain	1349001	1350000	4.01e-104		Repeat		tRNAval
12	W	grain	1481001	1482000	1.48e-80		Repeat		transposon
12	W	grain	2522001	2523000	0		18flag
12	C	Seedling	3358001	3359000		2.15e-250	Repeat		tRNAarg
12	W	grain	5270001	5271000	1.12e-73		Sparse
12	W/C	Seedling	5631001	5633000		3.13E-62/3.05E-132	Repeat		tRNAasn, tRNAarg
12	C	Seedling	6824001	6825000		1.22e-63	miRNA		miR169, new member
12	W	grain	8524001	8525000	7.77e-56		Repeat		45S rRNA
12	W	G/S	9353001	9355000	4.01e-104	2.66e-204	Disperse		Os12g16350, 3-hydroxyisobutyryl-coenzyme A hydrolase
12	W	G/S	11281001	11282000	5.85e-76	3.13e-62	Repeat		tRNAphe
12	C	grain	11292001	11293000	1.34e-53		Sparse
12	W	Seedling	11410001	11411000		1.21e-77	Repeat		tRNAhis
12	C	Seedling	12270001	12271000		5.75e-56	Repeat		40S ribosomal protein S3a
12	W	Seedling	13347001	13348000		1.3e-148	Repeat		tRNAphe
12	W	grain	13478001	13479000	1.96e-62		Sparse
12	C	grain	17037001	17038000	9.63e-212		Repeat		transposons
12	W	G/S	18300001	18301000	7.17e-83	0	miRNA		miR166g
12	W	grain	19349001	19350000	1.16e-53		Repeat
12	W	grain	20495001	20496000	9.99e-102		Repeat		tRNAlys
12	W	Seedling	20499001	20500000		1.09e-53	Repeat		tRNAasn
12	C	grain	20605001	20607000	2.16e-59		Repeat		45S rRNA
12	W/C	grain	23673001	23675000	3.20E-60/5.07E-111		Disperse	0.1717	Os12g38590 Pumilio-family
12	C	Seedling	25035001	25036000		4.82e-100	Sparse
12	W	G/S	25443001	25444000	2.1e-71	0	miRNA		miR167a
12	W	Seedling	25447001	25448000		0	miRNA		miR167h
12	C	grain	25841001	25842000	2.77e-65		Disperse		Os12g41760
12	C	G/S	26305001	26307000	3.56e-226	1.67e-69	Sparse	0.482	Os12g42380; MIRMON27; ID#1125181
12	C	G/S	26311001	26312000	0	0	Phased	0.9588
12	W	grain	26638001	26639000	7.29e-227		Repeat		tRNAgly
12	C	Seedling	27018001	27019000		2.15e-250	Repeat		tRNAarg
a, phase uniqueness score was calculated only for hotspots with at least six 21-nt phases
