# Supplementary material for: Characterization of Unique Small RNA Populations from Rice Grain
Source: PLoS One. 2008 Aug 6;3(8):e2871. doi: 10.1371/journal.pone.0002871 (PMC2518513; doi:10.1371/journal.pone.0002871)
Supplement: Table S4 — Predicted Targets for miRMON13 and miRMON18. (0.02 MB XLS) [file pone.0002871.s007.xls]

## Sheet: Sheet1
Table S4 Predicted Targets for miRMON13 and miRMON18
ID1076577 / miRMON13	Target	Site	Site	Score	Mismatch
Query (3' - 5')	TCGTCGTTCCTAACTTAGGAT
LOC_Os08g17970	agcggccaggauugaauccua	114	134	1.5	2	unclassified
LOC_Os08g01640	ggaggcaaggauugaauccug	1453	1473	2.5	4	PPR repeat
LOC_Os08g01650	ggcagcaaggauugaacccug	1325	1345	3	3	PPR repeat
LOC_Os10g35436	ggcagcaaggauugaauccgg	1327	1347	3	3	PPR repeat
LOC_Os10g35230	ggcagcaaggauugaguccga	1437	1457	3.5	3	PPR repeat
LOC_Os10g35240	ggcagcauggauugaauccga	1296	1316	3.5	3	PPR repeat
LOC_Os01g49580	aacaccaaggauugaguccuu	1788	1808	4	4
LOC_Os01g49614	aacaccaaggauugaguccuu	1138	1158	4	4	Ser/Thr protein kinase
LOC_Os05g40700	ugcugcaaggauuggauccuc	148	168	4	4	transmembrane protein 56
LOC_Os08g01870	ggcagcaaggauugcacccua	1304	1324	4.5	3	PPR repeat
LOC_Os10g35790	ggcagcaaggauugacuccga	626	646	4.5	3	PPR repeat
LOC_Os01g70280	ggcagcauggauuggauccaa	151	171	4.5	4	unclassified
ID 370903 / miRMON18	Target
Query (3' - 5')	ACAAACGACTACCAGTAGATT
LOC_Os02g45520	gauuuguugauggucaucuaa	165	185	2.5	3	SPX domain
LOC_Os04g48390	aguuugcugauguucaucuaa	334	354	3	2	SPX domain
